# Supplementary material for: The Expression of IbMYB1 Is Essential to Maintain the Purple Color of Leaf and Storage Root in Sweet Potato [Ipomoea batatas (L.) Lam]
Source: Front Plant Sci. 2021 Sep 23;12:688707. doi: 10.3389/fpls.2021.688707 (PMC8495246; doi:10.3389/fpls.2021.688707)
Supplement: Supplementary Table 1 — List of all primers for PCR. [file Table_1.xls]

## Sheet: Table S1
Supplementary Table S1
Primers used in this study
Experiment	Gene names	NCBI ID or Unigenes ID from reference transcriptome	Primer names	primer sequences (5'-3')＊
RT-qPCR	IbMYB1	MYB1.t1	MYB1-RTF	TATggTCgggATCgTCTTCg
			MYB1-RTR	TTCTgAAgATgggTgTTCCAT
	IbMYB2s	MYB2s.t1	IbMYB2s-RTF	TATggTCggAATCgTCTTCC
			IbMYB2s-RTR	TTCTgAAgATgggTgTTCCAg
	IbMYB2	g17106.t1	MYB2-F	TCgCCTTCgggATTgATg
			MYB2-R	TgAAgTCTCCTCgTTTgAT
	IbbHLH1	g16106.t1	bHLH1-F	TAgCgAAgAACCAAACCg
			bHLH1-R	ggAACTCCAggAACAATA
	IbbHLH2	g9535.t1	bHLH2-F	gTgggCAgTggTCggAgTT
			bHLH2-R	AgAAgggCgTATTTgAgg
	IbWDR1	g20700.t1	WDR1-F	AACTAATgTTTCACCCTAATCC
			WDR1-R	gTTTCCACCACgCCTTTC
	IbWDR2	g64148.t1	WDR2-F	gCACCCTTACCCTCCTAC
			WDR2-R	CAgCCTCgTTCCAgTCAA
	Actin (actin-2)	HX980265	act-RTF	TgCCTgATggACAAgTgA
			act-RTR	ggAgCgAgTgCTgTAATT
	rRNA (18s rRNA)	HM053485	rRNA-F	AgCAAgCCTACgCTCTgT
			rRNA-R	CTggTCggCATCgTTTAT
	TUA (α-tubulin)	HX974188	TUA-F	TgTCCTgTCAACCCATTCC
			TUA-R	TgAgggCACCATCAAACC
	IbCHS-D	g8138.t1	CHSD-F	gTCAACCAAAgCACCTACCC
			CHSD-R	CTCCACCACCgCAATgTC
	IbCHI	g3524.t1	CHI-F	TgTCgCCgAAgTCAAAgT
			CHI-R	TCTCAAAgggACCCgTAA
	IbDFR-A	g17020.t1	DFRA-F	gCTgTgAATTTCgCCTCC
			DFRA-R	ACCAgTTgTTgggTTTgT
	IbANS	g15751.t1	ANS-F	gCCAAgTgCgTCCCTAAC
			ANS-R	TgggCggCTCACAgAACA
IbMYB1 gene clone	IbMYB1s/2s		MYB2F-XbaI	CTCTAgAATggTTATTTCATCTgTATggTC
			MYB2R-BamHI	AggATCCTTAgCTTAACAgTTCTgACAgTAg
hi-TAIL PCR	The first cloning of 5' flanking sequence of IbMYB2s		MYB2repR	gTATCTTTTCATAACTACTTACTCAAC
			SP1	CgATCCCgACCATACAgATgAAATAACC
			SP2	CCTTCACCATATTTCTgAATgCACTCCC
			SP3	CgggACggAgATAATTCAACCATCTTAATC
	The second cloning of 5' flanking sequence of IbMYB2s		pB9R1	gTTCgggTgCggATATATCTTCC
			pB9R2	CCCgTgCggTTgTgTgATATTC
			pB9R3	CACCTTAAgTATACAAgCCATgC
			pB9R4	CgTACCTTAAgTTTCAACAAC
	3' flanking sequence cloning of IbMYB2s		MYB2repF	gTTgAgTAAgTAgTTATgAAAAgATAC
			MYB2-3UTR1	ACCACCCACCCAgCTTgTgTAAAgAgAg
			MYB2-3UTR2	ATACCAgTgATgATTTCAggACATgACC
	3' flanking sequence cloning of IbMYB1		QMYB1F	TgACgACACAACCggAAAC
			3UTR-F1	ACCgTgAACATTCATTAAgTgCCg
			3UTR-F2	AgAAATAggAggAAgACTgACATC
	Fusion degenerate primer		FP1	gTAATACgACTCACTATAgggCACgCgTggTNTCgASTWTSgWgTT
			FP5	gTAATACgACTCACTATAgggCACgCgTggTNgTAWAASgTNTSCAA
			FP3	gTAATACgACTCACTATAgggCACgCgTggTWgTgNAgWANCANAgA
	Nest primer		FSP1	gTAATACgACTCACTATAgggC
			FSP2	ACTATAgggCACgCgTggT
Genotype analysis	Specific to retrasnposon TNT1-94	MW819731	TIB6-R2	ACACCAgTTgCTAAgATgACCAC
			TIB6-R3	TCTTCTCACCTTTTCCTTTACAC
	Specific to IbMYB1 null	AB588639	Null_F	CTCCATCCATCCAAACAATgTAg
			Null_R	TAgTggAgAACAgAAgAgCCTAgC
	Specific to promotor of IbMYB1	AB576766 and AB576767	pMYBF1	TTCAAgCgCATCCAAACACTgg
			pMYBF2	TAAATgCgATATTggCTCTATgTgC
			pMYBF3	CCCAACTACCAAACATgCTA
	IbMYB1-2a/2b		Pro_MF_A	gTggAAAACATgTgCAgTgTCATC
			Pro_MR	ggACCATgAACCTTTTCTCACTCT
	IbMYB1-1	AB576765	Pro_MF_M	ACCTgAACCggCCCTTATTATg
			Pro_MR	ggACCATgAACCTTTTCTCACTCT
	IbMYB2-1/2-4	MYB2s.t1	IbMYB2s-RTF	TATggTCggAATCgTCTTCC
			1+4R	ACCAAgTgTAgTTAAAACCAAg
	IbMYB2-2/2-3	MYB2s.t1	IbMYB2s-RTF	TATggTCggAATCgTCTTCC
			2+3R	gTAgTTATCTgATTgTCTATCTTTC
	IbbHLH1	g16106.t1	bHLH1F	ATGGCAAGGGGAGAGGGATTTGC
			bHLH1R	CTAATCAAGGCTGGTGATGGTGAC
	IbbHLH2	g9535.t1	bHLH2F	ATGGCGGCGGAAAACCCTGTCGGC
			bHLH2R	CCTTGATGAGATAAGAAATTAGG
	IbWDR1	g20700.t1	WDR1F	ATGGAGAACTCAACCCAAGG
			WDR1R	TTACACTTTTAGCATCTGAA
	IbWDR2	g64148.t1	WDR2F	ATGGGGGCGAGCAGCGATCCGAAC
			WDR2R	CACACCCTGAGAATCTGAAGC
	IbANS	g15751.t1	ANSF	ATGGTGACTACTATTACTGTTCC
			ANSR	CATCAGGTTTGGGCGTGTCAGC
	IbMYB2	g17106.t1	MYB2F	ATGGTTAATTCATTATCATCTGC
			MYB2R	TAGCTTAGAAGTTCCAAAAGGTC
